# Supplementary material for: Dental Unit Waterlines: A Survey of Practices in Eastern France
Source: PubMed Central journal article supplement (PMC6862618; doi:10.3390/ijerph16214242), 2019-11-01
Supplement: ijerph-16-04242-s001.pdf [file ijerph-16-04242-s001.pdf]

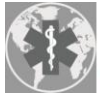

## Supplementary Material: Dental Unit Waterlines: A Survey of Practices in Eastern France

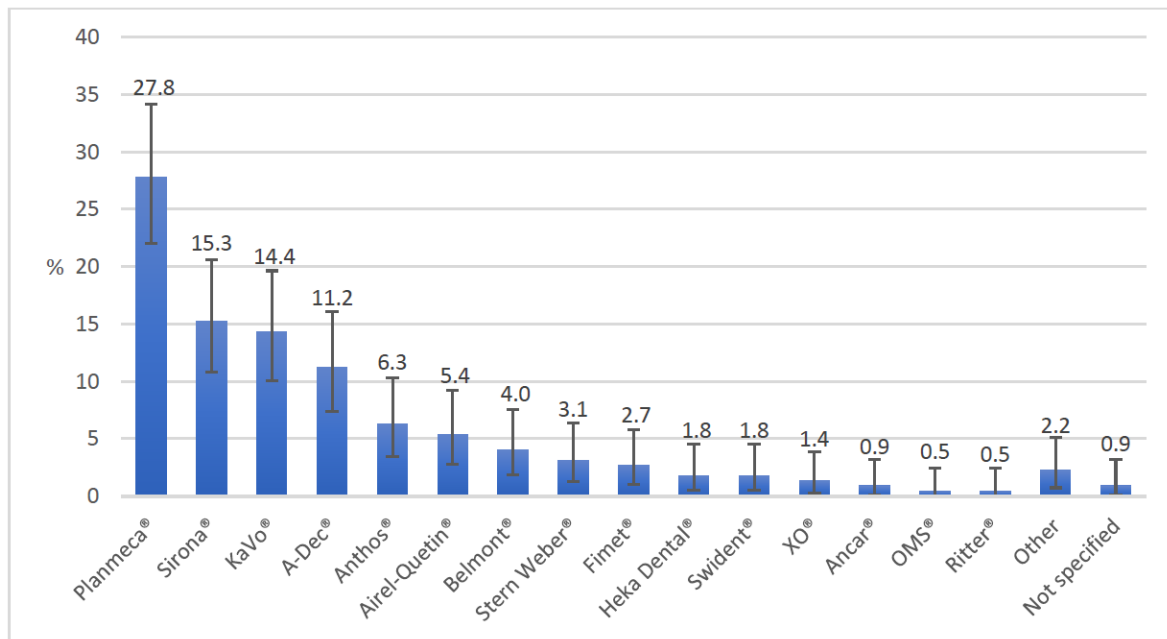

**Figure S1.** Brands of the 223 dental care units studied in Eastern France in 2016.
